# Supplementary material
Source: ML conference proceedings conference paper supplement (https://openreview.net/forum?id=jkhVrIllKg)
Supplement: supplementary_material [file attachment]

## A THEORY

### A.1 PROOF OF LEMMA 1

*Proof.* Let  $m = m_k$ . By differentiability of  $f$  and  $f_m$ , we have

$$f(\mathbf{w}_{k+1}) - f(\mathbf{w}_k) = \int_0^1 \langle \nabla f(\mathbf{w}_k + \tau(\mathbf{w}_{k+1} - \mathbf{w}_k)), \mathbf{w}_{k+1} - \mathbf{w}_k \rangle d\tau$$

and

$$f_m(\mathbf{w}_{k+1}) - f_m(\mathbf{w}_k) = \int_0^1 \langle \nabla f_m(\mathbf{w}_k + \tau(\mathbf{w}_{k+1} - \mathbf{w}_k)), \mathbf{w}_{k+1} - \mathbf{w}_k \rangle d\tau.$$

Denote, to simplify the expressions,  $\mathbf{w}(\tau) \stackrel{\text{def}}{=} \mathbf{w}_k + \tau(\mathbf{w}_{k+1} - \mathbf{w}_k)$ , then we get

$$\begin{aligned} f(\mathbf{w}_{k+1}) - f(\mathbf{w}_k) &= f_m(\mathbf{w}_{k+1}) - f_m(\mathbf{w}_k) + \int_0^1 \langle \nabla f(\mathbf{w}(\tau)) - \nabla f_m(\mathbf{w}(\tau)), \mathbf{w}_{k+1} - \mathbf{w}_k \rangle d\tau \\ &= f_m(\mathbf{w}_{k+1}) - f_m(\mathbf{w}_k) + \langle \mathbf{v}_k - \nabla f_m(\mathbf{w}_k), \mathbf{w}_{k+1} - \mathbf{w}_k \rangle \\ &\quad + \int_0^1 \langle \nabla f(\mathbf{w}(\tau)) - \nabla f_m(\mathbf{w}(\tau)) - \mathbf{v}_k + \nabla f_m(\mathbf{w}_k), \mathbf{w}_{k+1} - \mathbf{w}_k \rangle d\tau. \end{aligned}$$

Define the subproblem solved by SABER at iteration  $k$  as  $\phi_k(\mathbf{w}) = f_m(\mathbf{w}) + \langle \mathbf{v}_k - \nabla f_m(\mathbf{w}_k), \mathbf{w} - \mathbf{w}_k \rangle + \frac{1}{2\eta} \|\mathbf{w} - \mathbf{w}_k\|^2$ . Then, it holds  $\phi_k(\mathbf{w}_{k+1}) \leq \phi_k(\mathbf{w}_k)$  and

$$f_m(\mathbf{w}_{k+1}) - f_m(\mathbf{w}_k) + \langle \mathbf{v}_k - \nabla f_m(\mathbf{w}_k), \mathbf{w}_{k+1} - \mathbf{w}_k \rangle \leq -\frac{1}{2\eta} \|\mathbf{w}_{k+1} - \mathbf{w}_k\|^2.$$

Let us split the integral into two parts:

$$\begin{aligned} &\int_0^1 \langle \nabla f(\mathbf{w}(\tau)) - \nabla f_m(\mathbf{w}(\tau)) - \mathbf{v}_k + \nabla f_m(\mathbf{w}_k), \mathbf{w}_{k+1} - \mathbf{w}_k \rangle d\tau \\ &= \int_0^1 \langle \nabla f(\mathbf{w}(\tau)) - \nabla f_m(\mathbf{w}(\tau)) - \nabla f(\mathbf{w}_k) + \nabla f_m(\mathbf{w}_k), \mathbf{w}_{k+1} - \mathbf{w}_k \rangle d\tau \\ &\quad + \langle \nabla f(\mathbf{w}_k) - \mathbf{v}_k, \mathbf{w}_{k+1} - \mathbf{w}_k \rangle. \end{aligned}$$

The first part can be upper bounded using the data heterogeneity assumption:

$$\begin{aligned} &\int_0^1 \langle \nabla f(\mathbf{w}(\tau)) - \nabla f_m(\mathbf{w}(\tau)) - \nabla f(\mathbf{w}_k) + \nabla f_m(\mathbf{w}_k), \mathbf{w}_{k+1} - \mathbf{w}_k \rangle d\tau \\ &\leq \int_0^1 \|\nabla f(\mathbf{w}(\tau)) - \nabla f_m(\mathbf{w}(\tau)) - \nabla f(\mathbf{w}_k) + \nabla f_m(\mathbf{w}_k)\| \|\mathbf{w}_{k+1} - \mathbf{w}_k\| d\tau \\ &\leq \int_0^1 \delta \|\mathbf{w}(\tau) - \mathbf{w}_k\| \|\mathbf{w}_{k+1} - \mathbf{w}_k\| d\tau = \delta \int_0^1 \tau \|\mathbf{w}_{k+1} - \mathbf{w}_k\|^2 d\tau = \frac{\delta}{2} \|\mathbf{w}_{k+1} - \mathbf{w}_k\|^2 \\ &\stackrel{\eta \leq \frac{1}{4\delta}}{\leq} \frac{1}{8\eta} \|\mathbf{w}_{k+1} - \mathbf{w}_k\|^2. \end{aligned}$$

For the second part, we use Young's inequality

$$\langle \nabla f(\mathbf{w}_k) - \mathbf{v}_k, \mathbf{w}_{k+1} - \mathbf{w}_k \rangle \leq 2\eta \|\nabla f(\mathbf{w}_k) - \mathbf{v}_k\|^2 + \frac{1}{8\eta} \|\mathbf{w}_{k+1} - \mathbf{w}_k\|^2.$$

Thus, combining the bounds on the integral with the initial inequalities, we obtain

$$\begin{aligned} f(\mathbf{w}_{k+1}) - f(\mathbf{w}_k) &\leq -\frac{1}{2\eta} \|\mathbf{w}_{k+1} - \mathbf{w}_k\|^2 + \frac{1}{8\eta} \|\mathbf{w}_{k+1} - \mathbf{w}_k\|^2 + 2\eta \|\mathbf{v}_k - \nabla f(\mathbf{w}_k)\|^2 \\ &\quad + \frac{1}{8\eta} \|\mathbf{w}_{k+1} - \mathbf{w}_k\|^2 \\ &= -\frac{1}{4\eta} \|\mathbf{w}_{k+1} - \mathbf{w}_k\|^2 + 2\eta \|\mathbf{v}_k - \nabla f(\mathbf{w}_k)\|^2. \end{aligned}$$

□

## A.2 PROOF OF LEMMA 2

*Proof.* Denote by  $j$  the index sampled to update  $\mathbf{v}_{k+1}$ , i.e.,  $j = m_{k+1}$ . With probability  $p$ , we have  $\mathbf{v}_{k+1} = \nabla f(\mathbf{w}_{k+1})$ , so

$$\begin{aligned} & \mathbb{E} [\|\nabla f(\mathbf{w}_{k+1}) - \mathbf{v}_{k+1}\|^2] \\ &= p \cdot 0 + (1-p)\mathbb{E} [\|\nabla f(\mathbf{w}_{k+1}) - \mathbf{v}_k - \nabla f_j(\mathbf{w}_{k+1}) + \nabla f_j(\mathbf{w}_k)\|^2] \\ &= (1-p)\mathbb{E} [\|\nabla f(\mathbf{w}_k) - \mathbf{v}_k + \nabla f(\mathbf{w}_{k+1}) - \nabla f(\mathbf{w}_k) - \nabla f_j(\mathbf{w}_{k+1}) + \nabla f_j(\mathbf{w}_k)\|^2] \\ &= (1-p)\mathbb{E} [\|\nabla f(\mathbf{w}_k) - \mathbf{v}_k\|^2] \\ &\quad + (1-p)\mathbb{E} [2\langle \nabla f(\mathbf{w}_k) - \mathbf{v}_k, \nabla f(\mathbf{w}_{k+1}) - \nabla f(\mathbf{w}_k) - \nabla f_j(\mathbf{w}_{k+1}) + \nabla f_j(\mathbf{w}_k) \rangle] \\ &\quad + (1-p)\mathbb{E} [\|\nabla f(\mathbf{w}_{k+1}) - \nabla f(\mathbf{w}_k) - \nabla f_j(\mathbf{w}_{k+1}) + \nabla f_j(\mathbf{w}_k)\|^2]. \end{aligned}$$

Since  $j$  is sampled after we have produced  $\mathbf{w}_{k+1}$ , it is independent of  $\mathbf{w}_{k+1}$ , and it holds

$$\mathbb{E} [\langle \nabla f(\mathbf{w}_k) - \mathbf{v}_k, \nabla f(\mathbf{w}_{k+1}) - \nabla f(\mathbf{w}_k) - \nabla f_j(\mathbf{w}_{k+1}) + \nabla f_j(\mathbf{w}_k) \rangle] = 0.$$

Moreover, by second-order data heterogeneity, we have

$$\mathbb{E} [\|\nabla f(\mathbf{w}_{k+1}) - \nabla f(\mathbf{w}_k) - \nabla f_j(\mathbf{w}_{k+1}) + \nabla f_j(\mathbf{w}_k)\|^2] \leq \delta^2 \mathbb{E} [\|\mathbf{w}_{k+1} - \mathbf{w}_k\|^2].$$

Putting the pieces together yields the claim.  $\square$

## A.3 PROOF OF LEMMA 3

*Proof.* The first-order optimality condition for the problem in the definition of  $\mathbf{w}_{k+1}$  writes

$$\nabla \phi_k(\mathbf{w}_{k+1}) = 0 = \nabla f_m(\mathbf{w}_{k+1}) + \mathbf{v}_k - \nabla f_m(\mathbf{w}_k) + \frac{1}{\eta}(\mathbf{w}_{k+1} - \mathbf{w}_k),$$

where  $m = m_k$ . From this equation, we obtain

$$\begin{aligned} & \|\mathbf{w}_{k+1} - \mathbf{w}_k\|^2 \\ &= \eta^2 \|\mathbf{v}_k + \nabla f_m(\mathbf{w}_{k+1}) - \nabla f_m(\mathbf{w}_k)\|^2 \\ &= \eta^2 \|\nabla f(\mathbf{w}_{k+1}) + [\mathbf{v}_k - \nabla f(\mathbf{w}_k)] + [\nabla f(\mathbf{w}_k) - \nabla f(\mathbf{w}_{k+1}) + \nabla f_m(\mathbf{w}_{k+1}) - \nabla f_m(\mathbf{w}_k)]\|^2. \end{aligned}$$

By Cauchy-Schwarz inequality, it holds  $\|a + b + c\|^2 \leq 3(\|a\|^2 + \|b\|^2 + \|c\|^2)$  for any vectors  $a, b, c \in \mathbb{R}^d$ . Rearranging, it also implies  $\|a\|^2 \geq \frac{1}{3}\|a + b + c\|^2 - \|b\|^2 - \|c\|^2$ , which in our case gives

$$\begin{aligned} \mathbb{E} [\|\mathbf{w}_{k+1} - \mathbf{w}_k\|^2] &\geq \frac{\eta^2}{3} \mathbb{E} [\|\nabla f(\mathbf{w}_{k+1})\|^2] - \eta^2 \mathbb{E} [\|\mathbf{v}_k - \nabla f(\mathbf{w}_k)\|^2] \\ &\quad - \eta^2 \mathbb{E} [\|\nabla f(\mathbf{w}_k) - \nabla f(\mathbf{w}_{k+1}) + \nabla f_m(\mathbf{w}_{k+1}) - \nabla f_m(\mathbf{w}_k)\|^2] \\ &\stackrel{(2)}{\geq} \frac{\eta^2}{3} \mathbb{E} [\|\nabla f(\mathbf{w}_{k+1})\|^2] - \eta^2 \|\mathbf{v}_k - \nabla f(\mathbf{w}_k)\|^2 - \eta^2 \delta^2 \|\mathbf{w}_{k+1} - \mathbf{w}_k\|^2. \end{aligned}$$

Notice that  $\|\mathbf{w}_{k+1} - \mathbf{w}_k\|^2$  appears in both sides, so we can rearrange and divide by  $1 + \eta^2 \delta^2$ :

$$\begin{aligned} \mathbb{E} [\|\mathbf{w}_{k+1} - \mathbf{w}_k\|^2] &\geq \frac{1}{1 + \eta^2 \delta^2} \mathbb{E} \left[ \frac{\eta^2}{3} \|\nabla f(\mathbf{w}_{k+1})\|^2 - \eta^2 \|\mathbf{v}_k - \nabla f(\mathbf{w}_k)\|^2 \right] \\ &\stackrel{\eta \leq \frac{1}{3\delta}}{\geq} \frac{9}{10} \mathbb{E} \left[ \frac{\eta^2}{3} \|\nabla f(\mathbf{w}_{k+1})\|^2 - \eta^2 \|\mathbf{v}_k - \nabla f(\mathbf{w}_k)\|^2 \right] \\ &\geq \mathbb{E} \left[ \frac{\eta^2}{4} \|\nabla f(\mathbf{w}_{k+1})\|^2 - \eta^2 \|\mathbf{v}_k - \nabla f(\mathbf{w}_k)\|^2 \right]. \end{aligned}$$

$\square$

## A.4 PROOF OF THEOREM 1

*Proof.* Recall that we define a Lyapunov function

$$\mathcal{L}_k \stackrel{\text{def}}{=} f(\mathbf{w}_k) + c\|\mathbf{v}_k - \nabla f(\mathbf{w}_k)\|^2,$$

where we will choose  $c > 0$  later in the proof. Lemmas 1 and 2 already bound the first and the second terms in  $\mathcal{L}_{k+1}$  correspondingly, giving us the following recursion:

$$\begin{aligned} \mathbb{E}[\mathcal{L}_{k+1}] &\leq f(\mathbf{w}_k) + \mathbb{E}\left[-\frac{1}{2\eta}\|\mathbf{w}_{k+1} - \mathbf{w}_k\|^2 + 2\eta\|\nabla f(\mathbf{w}_k) - \mathbf{v}_k\|^2\right] \\ &\quad + c(1-p)\|\nabla f(\mathbf{w}_k) - \mathbf{v}_k\|^2 + c\delta^2\mathbb{E}[\|\mathbf{w}_{k+1} - \mathbf{w}_k\|^2] \\ &= \mathcal{L}_k - c\|\nabla f(\mathbf{w}_k) - \mathbf{v}_k\|^2 + \left(c\delta^2 - \frac{1}{2\eta}\right)\mathbb{E}[\|\mathbf{w}_{k+1} - \mathbf{w}_k\|^2] \\ &\quad + (2\eta + c(1-p))\|\nabla f(\mathbf{w}_k) - \mathbf{v}_k\|^2 \\ &= \mathcal{L}_k + \left(c\delta^2 - \frac{1}{2\eta}\right)\mathbb{E}[\|\mathbf{w}_{k+1} - \mathbf{w}_k\|^2] + (2\eta - cp)\|\nabla f(\mathbf{w}_k) - \mathbf{v}_k\|^2. \end{aligned}$$

Let us set  $c = \frac{3\eta}{p}$  to make the last term negative. Then, we obtain

$$\begin{aligned} \mathbb{E}[\mathcal{L}_{k+1}] &\leq \mathcal{L}_k + \left(\frac{3\eta\delta^2}{p} - \frac{1}{2\eta}\right)\mathbb{E}[\|\mathbf{w}_{k+1} - \mathbf{w}_k\|^2] - \eta\|\nabla f(\mathbf{w}_k) - \mathbf{v}_k\|^2 \\ &\stackrel{\eta \leq \frac{\sqrt{p}}{4\delta}}{\leq} \mathcal{L}_k - \frac{1}{4\eta}\mathbb{E}[\|\mathbf{w}_{k+1} - \mathbf{w}_k\|^2] - \eta\|\mathbf{v}_k - \nabla f(\mathbf{w}_k)\|^2 \\ &\stackrel{(4)}{\leq} \mathcal{L}_k - \frac{\eta}{16}\mathbb{E}[\|\nabla f(\mathbf{w}_{k+1})\|^2] + \frac{\eta}{4}\|\mathbf{v}_k - \nabla f(\mathbf{w}_k)\|^2 - \eta\|\mathbf{v}_k - \nabla f(\mathbf{w}_k)\|^2 \\ &\leq \mathcal{L}_k - \frac{\eta}{16}\mathbb{E}[\|\nabla f(\mathbf{w}_{k+1})\|^2]. \end{aligned}$$

Recurring this to  $\mathcal{L}_0 = f(\mathbf{w}_0) + c\|\mathbf{v}_0 - \nabla f(\mathbf{w}_0)\|^2 = f(\mathbf{w}_0)$ , we get

$$\frac{1}{K} \sum_{k=1}^K \mathbb{E}[\|\nabla f(\mathbf{w}_k)\|^2] \leq \frac{16}{\eta K} (\mathcal{L}_0 - \mathbb{E}[\mathcal{L}_K]) \leq \frac{16(f(\mathbf{w}_0) - f_*)}{\eta K},$$

where we used the fact that  $\mathcal{L}_K = f(\mathbf{w}_K) + c\|\mathbf{v}_K - \nabla f(\mathbf{w}_K)\|^2 \geq f(\mathbf{w}_K) \geq f_*$ .  $\square$
